# Supplementary material for: Unraveling the electronic structure of LuH, LuN, and LuNH: building blocks of new materials
Source: Royal Society of Chemistry journal article supplement (doi:10.1039/d4cp00533c), 2024-01-01
Supplement: d4cp00533c1.pdf [file d4cp00533c1.pdf]

## Unraveling the electronic structure of LuH, LuN, and LuNH: Building blocks of potential new materials

Nuno M. S. Almeida<sup>a</sup>, Bradley K. Welch<sup>a</sup>, Sasha C. North<sup>a</sup>, Angela K. Wilson<sup>a\*</sup>

<sup>a</sup>Michigan State University, Department of Chemistry, East Lansing, MI 48864, U.S.A

\*akwilson@msu.edu

Table S1 - CI vectors from CASSCF calculations for the equilibrium bond lengths of LuH. 0,  $\alpha$ ,  $\beta$ , and 2, correspond to orbital occupations: zero, one ( $\alpha$ -spin), one ( $\beta$ -spin), and two (doubly occupied). CI vectors with weights above 0.25 were considered.

| States                        | Coeff | 1s<br>(H) | 6s<br>(Lu) | 6p <sub>z</sub><br>(Lu) | 5d <sub>x<sup>2</sup>-y<sup>2</sup></sub><br>(Lu) | 5d <sub>z<sup>2</sup></sub> (Lu)+<br>2s (H) | 6p <sub>x</sub><br>(Lu) | 5d <sub>xz</sub><br>(Lu) | 6p <sub>y</sub><br>(Lu) | 5d <sub>yz</sub><br>(Lu) | 5d <sub>xy</sub><br>(Lu) |
|-------------------------------|-------|-----------|------------|-------------------------|---------------------------------------------------|---------------------------------------------|-------------------------|--------------------------|-------------------------|--------------------------|--------------------------|
| X <sup>1</sup> Σ <sup>+</sup> | 0.94  | 2         | 2          | 0                       | 0                                                 | 0                                           | 0                       | 0                        | 0                       | 0                        | 0                        |
| 1 <sup>3</sup> Δ              | 0.98  | 2         | α          | 0                       | α                                                 | 0                                           | 0                       | 0                        | 0                       | 0                        | 0                        |
| 1 <sup>3</sup> Π              | 0.96  | 2         | α          | 0                       | 0                                                 | 0                                           | α                       | 0                        | 0                       | 0                        | 0                        |
| 1 <sup>3</sup> Σ <sup>+</sup> | 0.97  | 2         | α          | α                       | 0                                                 | 0                                           | 0                       | 0                        | 0                       | 0                        | 0                        |
| 1 <sup>1</sup> Δ              | 0.61  | 2         | α          | 0                       | β                                                 | 0                                           | 0                       | 0                        | 0                       | 0                        | 0                        |
|                               | 0.61  | 2         | β          | 0                       | α                                                 | 0                                           | 0                       | 0                        | 0                       | 0                        | 0                        |
| 1 <sup>1</sup> Π              | -0.59 | 2         | α          | 0                       | 0                                                 | 0                                           | 0                       | β                        | 0                       | 0                        | 0                        |
|                               | 0.59  | 2         | β          | 0                       | 0                                                 | 0                                           | 0                       | α                        | 0                       | 0                        | 0                        |
| 2 <sup>3</sup> Π              | 0.94  | 2         | α          | 0                       | 0                                                 | 0                                           | 0                       | α                        | 0                       | 0                        | 0                        |
| 2 <sup>1</sup> Σ <sup>+</sup> | 0.60  | 2         | α          | β                       | 0                                                 | 0                                           | 0                       | 0                        | 0                       | 0                        | 0                        |
|                               | -0.60 | 2         | β          | α                       | 0                                                 | 0                                           | 0                       | 0                        | 0                       | 0                        | 0                        |
| 2 <sup>1</sup> Π              | -0.47 | 2         | α          | 0                       | 0                                                 | 0                                           | β                       | 0                        | 0                       | 0                        | 0                        |
|                               | 0.47  | 2         | β          | 0                       | 0                                                 | 0                                           | α                       | 0                        | 0                       | 0                        | 0                        |

Table S2 - Bond lengths ( $R_e$ ), harmonic vibrational frequencies ( $\omega_e$ ), anharmonicity constants ( $\omega_e\chi_e$ ),  $\Delta G_{1/2}$ , and excitation energies ( $T_e$ ) for the lowest electronic excited states of LuH. The state compositions were obtained at the ground state equilibrium bond length. MRCI spin-orbit calculations were performed using cc-pVTZ-DK3 for Lu and aug-cc-pVTZ-DK with DKH3.

| States                                      | $R_e$ (Å)          | $\omega_e$ (cm <sup>-1</sup> ) | $\omega_e\chi_e$ (cm <sup>-1</sup> ) | $\Delta G_{1/2}$ (cm <sup>-1</sup> ) | $T_e$ (cm <sup>-1</sup> ) | Composition                                                                           |
|---------------------------------------------|--------------------|--------------------------------|--------------------------------------|--------------------------------------|---------------------------|---------------------------------------------------------------------------------------|
| X <sup>1</sup> Σ <sup>+</sup> <sub>0+</sub> | 1.927              | 1539.2                         | 54.3                                 | 1430.6                               | 0                         | 99.71% X <sup>1</sup> Σ <sup>+</sup> , 0.30% 1 <sup>3</sup> Π                         |
|                                             | 1.906 <sup>1</sup> | 1540.98                        | 22.06                                | -                                    | 0                         | -                                                                                     |
| 1 <sup>3</sup> Π <sub>0</sub>               | 1.952              | 1519.2                         | 76.2                                 | 1366.8                               | 11105.7                   | 77.30% <sup>3</sup> Π, 22.70 1 <sup>3</sup> Σ <sup>+</sup>                            |
|                                             | 1.947 <sup>1</sup> | 1456.30                        | 42.53                                | -                                    | 10797                     | -                                                                                     |
| 1 <sup>3</sup> Δ <sub>1</sub>               | 1.973              | 1435.9                         | 59.8                                 | 1316.4                               | 11871.0                   | 56.11% 1 <sup>3</sup> Π, 41.89% 1 <sup>3</sup> Δ, 9.07% 1 <sup>3</sup> Σ <sup>+</sup> |
|                                             | 1.951 <sup>1</sup> | 1442.10                        | 39.59                                | -                                    | 12873                     | -                                                                                     |

|                 |                    |         |       |        |         |                                                            |
|-----------------|--------------------|---------|-------|--------|---------|------------------------------------------------------------|
| $1^3\Pi_{0+}$   | 1.951              | 1420.2  | 32.7  | 1346.2 | 12133.2 | 99.70% $1^3\Pi$ , 0.30% $X^1\Sigma^+$                      |
|                 | 1.936 <sup>1</sup> | 1474.71 | 40.47 | -      | 11838   | -                                                          |
| $1^3\Delta_2$   | 1.981              | 1419.0  | 50.6  | 1317.8 | 12700.1 | 81.65% $1^3\Delta$ , 13.20% $1^3\Pi$ , 5.16% $1^1\Delta$   |
|                 | 1.939 <sup>1</sup> | 1471.51 | 42.98 | -      | 14498   | -                                                          |
| $1^3\Pi_1$      | 1.962              | 1420.2  | 32.7  | 1356.1 | 12730.9 | 56.11% $1^3\Pi$ , 34.82% $1^3\Delta$ , 9.07% $1^3\Sigma^+$ |
|                 | 1.951 <sup>1</sup> | 1448.38 | 43.02 | -      | 11506   | --                                                         |
| $1^1\Delta_3$   | 1.974              | 1573.2  | 32.7  | -      | 14009.8 | $1^3\Delta$ 100%                                           |
|                 | 1.945 <sup>1</sup> | 1457.80 | 44.66 | -      | 15342   |                                                            |
| $1^3\Pi_2$      | 1.958              | 1434.4  | 17.9  | 1398.5 | 14503.3 | 84.90% $1^3\Pi$ , 14.79% $1^3\Delta$ , 0.32% $1^1\Delta$   |
|                 | 1.953 <sup>1</sup> | 1436.15 | 23.61 | -      | 1436.15 | -                                                          |
| $1^3\Sigma^+_1$ | 1.963              | 1403.2  | 30.9  | 1341.3 | 15248.8 | 70.04% $1^3\Sigma^+$ , 29.17% $1^3\Pi$ , 0.79% $1^3\Delta$ |
|                 | 1.945 <sup>1</sup> | 1467.16 | 42.04 | -      | 14163   | -                                                          |
| $1^3\Sigma^+_0$ | 1.964              | 1532.2  | 41.17 | -      | 15401.1 | 77.31% $1^3\Sigma^+$ , 22.70% $1^3\Pi$                     |
|                 | 1.951 <sup>1</sup> | 1457.14 | 42.91 | -      | 14057   | -                                                          |
| $1^1\Delta_2$   | 1.998              | 1578.4  | 45.86 | -      | 16944.2 | 94.56% $1^1\Pi$ , 3.54% $1^3\Delta$ , 1.90% $1^3\Pi$       |
|                 | 1.976 <sup>1</sup> | 1413.90 | 42.35 | -      | 16798   | -                                                          |

Table S3 - CI vectors from CASSCF calculations for the equilibrium bond lengths of LuN. 0,  $\alpha$ ,  $\beta$ , and 2, correspond to orbital occupations: zero, one ( $\alpha$ -spin), one ( $\beta$ -spin), and two (doubly occupied). CI vectors with weights above 0.25 were considered. The  $3p_{x,y,z}$  of nitrogen were omitted, because their occupation is always zero.

| States        | $R_{eq}$ (Å) | Coeff | $2p_z$<br>(N) | $6s$<br>(Lu) | $5d_{x^2-y^2}$<br>(Lu) | $6p_z$<br>(Lu) | $5d_{z^2}$<br>(Lu) | $2p_x$<br>(N) | $6p_x$<br>(Lu) | $5d_{xz}$<br>(Lu) | $2p_y$<br>(N) | $6p_y$<br>(Lu) | $5d_{yz}$<br>(Lu) | $5d_{xy}$<br>(Lu) |
|---------------|--------------|-------|---------------|--------------|------------------------|----------------|--------------------|---------------|----------------|-------------------|---------------|----------------|-------------------|-------------------|
| $X^1\Sigma^+$ | 1.85         | 0.54  | 2             | 0            | 0                      | 0              | 0                  | 2             | 0              | 0                 | 2             | 0              | 0                 | 0                 |
|               |              | -0.46 | $\beta$       | $\alpha$     | 0                      | 0              | 0                  | 2             | 0              | 0                 | 2             | 0              | 0                 | 0                 |
|               |              | 0.46  | $\alpha$      | $\beta$      | 0                      | 0              | 0                  | 2             | 0              | 0                 | 2             | 0              | 0                 | 0                 |
| $1^3\Sigma^+$ | 1.85         | 0.89  | $\alpha$      | $\alpha$     | 0                      | 0              | 0                  | 2             | 0              | 0                 | 2             | 0              | 0                 | 0                 |
| $1^3\Pi$      | 1.95         | -0.43 | $\alpha$      | 2            | 0                      | 0              | 0                  | $\alpha$      | 0              | 0                 | 2             | 0              | 0                 | 0                 |
|               |              | 0.79  | 2             | $\alpha$     | 0                      | 0              | 0                  | $\alpha$      | 0              | 0                 | 2             | 0              | 0                 | 0                 |
| $1^1\Pi$      | 1.95         | 0.61  | 2             | $\beta$      | 0                      | 0              | 0                  | $\alpha$      | 0              | 0                 | 2             | 0              | 0                 | 0                 |
|               |              | -0.61 | 2             | $\alpha$     | 0                      | 0              | 0                  | $\beta$       | 0              | 0                 | 2             | 0              | 0                 | 0                 |
| $1^3\Sigma^-$ | 2.20         | 0.94  | 2             | 2            | 0                      | 0              | 0                  | $\alpha$      | 0              | 0                 | $\alpha$      | 0              | 0                 | 0                 |
| $1^3\Delta$   | 2.00         | 0.44  | 2             | 0            | 0                      | 0              | 0                  | 2             | 0              | 0                 | $\alpha$      | $\alpha$       | 0                 | 0                 |
|               |              | -0.44 | 2             | 0            | 0                      | 0              | 0                  | $\alpha$      | $\alpha$       | 0                 | 2             | 0              | 0                 | 0                 |
|               |              | -0.29 | $\alpha$      | $\alpha$     | 0                      | 0              | 0                  | $\alpha$      | $\beta$        | 0                 | 2             | 0              | 0                 | 0                 |
|               |              | 0.29  | $\alpha$      | $\alpha$     | 0                      | 0              | 0                  | 2             | 0              | 0                 | $\alpha$      | $\beta$        | 0                 | 0                 |
|               |              | 0.26  | $\alpha$      | $\alpha$     | 0                      | 0              | 0                  | $\beta$       | $\alpha$       | 0                 | 2             | 0              | 0                 | 0                 |
|               |              | -0.26 | $\alpha$      | $\alpha$     | 0                      | 0              | 0                  | 2             | 0              | 0                 | $\beta$       | $\alpha$       | 0                 | 0                 |
| $2^3\Pi$      | 2.20         | 0.42  | $\alpha$      | 2            | 0                      | 0              | 0                  | $\alpha$      | 0              | 0                 | 2             | 0              | 0                 | 0                 |
|               |              | 0.66  | 2             | $\alpha$     | 0                      | 0              | 0                  | $\alpha$      | 0              | 0                 | 2             | 0              | 0                 | 0                 |

Table S4 - Bond lengths ( $R_e$ ), harmonic vibrational frequencies ( $\omega_e$ ), anharmonicity constants ( $\omega_e\chi_e$ ),  $\Delta G_{1/2}$ , and excitation energies ( $T_e$ ) for the lowest electronic excited states of LuN. The state compositions were obtained at the ground state equilibrium bond length. MRCI spin-orbit calculations were performed using ECPMWB28-Seg for Lu and aug-cc-pVTZ for N.

| States             | $R_e$ (Å) | $\omega_e$ (cm <sup>-1</sup> ) | $\omega_e\chi_e$ (cm <sup>-1</sup> ) | $\Delta G_{1/2}$ (cm <sup>-1</sup> ) | $T_e$ (cm <sup>-1</sup> ) | Composition                                                               |
|--------------------|-----------|--------------------------------|--------------------------------------|--------------------------------------|---------------------------|---------------------------------------------------------------------------|
| $X^1\Sigma^+_{0+}$ | 1.876     | 790.3                          | 6.2                                  | 777.8                                | 0                         | 97.26% $X^1\Sigma^+$ , 2.72% $1^3\Pi$                                     |
| $1^3\Sigma^+_{0-}$ | 1.848     | 802.7                          | 13.6                                 | 775.6                                | 3215.3                    | 99.64% $1^3\Pi$ , 0.35% $^3\Pi$                                           |
| $1^3\Sigma^+_{1-}$ | 1.848     | 814.1                          | 33.8                                 | 746.4                                | 3219.9                    | 97.89% $1^3\Sigma^+$ , 0.98% $1^1\Pi$ , 0.93% $1^3\Pi$ , 0.20% $1^3\Pi$   |
| $1^3\Pi_2$         | 2.001     | -                              | -                                    | -                                    | 3895.4                    | 100% $1^3\Pi$                                                             |
| $1^3\Pi_1$         | 2.002     | -                              | -                                    | -                                    | 4392.9                    | 96.35% $1^3\Pi$ , 3.16% $1^1\Pi$ , 0.49% $2^3\Pi_1$ , $1^3\Sigma^+$ 0.01% |
| $1^1\Pi_1$         | 1.922     | 883.2                          | 42.6                                 | 798.0                                | 6574.8                    | 98.58% $1^3\Pi$ , 1.06% $2^3\Pi$ , 0.36% $1^3\Sigma^+$                    |
| $1^3\Pi_0-$        | 1.942     | -                              | -                                    | -                                    | 4629.6                    | 99.64% $1^3\Pi$ , 0.35%                                                   |
| $1^3\Pi_0+$        | 1.982     | -                              | -                                    | -                                    | 4621.8                    | 96.09% $1^1\Pi$ , 2.98% $1^3\Pi$ , 0.58% $2^3\Pi$ , 0.35% $1^3\Sigma^+$   |
| $1^1\Pi_1$         | 1.922     | 883.2                          | 42.6                                 | 798.0                                | 6574.8                    | 97.26% $X^1\Sigma^+$ , 2.72% $1^3\Pi$                                     |

Table S5 - CI vectors from CASSCF calculations for the equilibrium bond lengths of LuNH. 0,  $\alpha$ , and 2, correspond to orbital occupations: zero, one ( $\alpha$ -spin), and two (doubly occupied). CI vectors with weights above 0.25 were considered.

| States        | $R_{eq}$ (Å) | Coeff | $2p_z$ (N)<br>+1s (H) | $6s$ (Lu) | $5d_{x^2-y^2}$ (Lu) | $6p_z$ (Lu) | $5d_z^2$ (Lu) | $2p_x$ (N) | $6p_x$ (Lu) | $5d_{xz}$ (Lu) | $2p_y$ (N) | $6p_y$ (Lu) | $5d_{yz}$ (Lu) | $5d_{xy}$ (Lu) |
|---------------|--------------|-------|-----------------------|-----------|---------------------|-------------|---------------|------------|-------------|----------------|------------|-------------|----------------|----------------|
| $X^2\Sigma^+$ | 1.85         | 0.92  | 2                     | $\alpha$  | 0                   | 0           | 0             | 2          | 0           | 0              | 2          | 0           | 0              | 0              |
| $1^2\Pi$      | 2.00         | 0.93  | 2                     | 2         | 0                   | 0           | 0             | $\alpha$   | 0           | 0              | 2          | 0           | 0              | 0              |
| $1^4\Sigma^+$ | 2.10         | 0.69  | 2                     | $\alpha$  | 0                   | 0           | 0             | $\alpha$   | $\alpha$    | 0              | 2          | 0           | 0              | 0              |
|               |              | 0.69  | 2                     | $\alpha$  | 0                   | 0           | 0             | 2          | 0           | 0              | $\alpha$   | $\alpha$    | 0              | 0              |

Table S6: Symmetries, bond lengths ( $R_e$ ), angles, harmonic vibrational frequencies ( $\omega_e$ ), and excitation energies ( $T_e$ ) of the LuNH isomers.

| Structure        | $R_e$ (Å)    | Angle - N-Lu-H (°) | $\omega_e$ (cm <sup>-1</sup> ) | $T_e$ (cm <sup>-1</sup> ) |
|------------------|--------------|--------------------|--------------------------------|---------------------------|
| $^2A' - N-Lu-H$  | 1.866 (Lu-N) | 123.9              | 278.80, 743.47                 | 21373.5                   |
|                  | 1.968 (N-H)  |                    | 1448.91                        |                           |
| $^4A' - N-Lu-H$  | 2.076 (Lu-N) | 132.2              | 187.62, 465.08                 | 22915.9                   |
|                  | 1.946 (N-H)  |                    | 1469.15                        |                           |
| $^2B_2 - N-Lu-H$ | 1.869 (Lu-N) | 180.0              | 243.89                         | 29365.4                   |
|                  | 2.047 (N-H)  |                    | 758.26, 1356.92                |                           |
| $^4B_2 - N-Lu-H$ | 2.112 (Lu-N) | 180.0              | 194.00                         | 29977.5                   |
|                  | 1.983 (N-H)  |                    | 545.15, 1452.16                |                           |

Table S7 - Bond lengths ( $R_e$ ), harmonic vibrational frequencies ( $\omega_e$ ), anharmonicity constants ( $\omega_e\chi_e$ ),  $\Delta G_{1/2}$ , excitation energies ( $T_e$ ) for the lowest electronic excited states of LuNH. The state compositions were obtained at the ground state equilibrium bond length. MRCI spin-orbit calculations were performed using ECPMWB28-Seg for Lu and aug-cc-pVTZ for N and H.

| States | $R_e$ (Å) | $\omega_e$ (cm <sup>-1</sup> ) | $\omega_e\chi_e$ (cm <sup>-1</sup> ) | $\Delta G_{1/2}$ (cm <sup>-1</sup> ) | $T_e$ (cm <sup>-1</sup> ) | Composition |
|--------|-----------|--------------------------------|--------------------------------------|--------------------------------------|---------------------------|-------------|
|--------|-----------|--------------------------------|--------------------------------------|--------------------------------------|---------------------------|-------------|

|                     |       |       |      |       |        |                                       |
|---------------------|-------|-------|------|-------|--------|---------------------------------------|
| $X^2\Sigma^+_{1/2}$ | 1.892 | 801.4 | -2.8 | 802.7 | 0      | 99.78 $X^2\Sigma^+$ , 0.22% $1^2\Pi$  |
| $1^2\Pi_{3/2}$      | 2.081 | 541.6 | -2.7 | 541.6 | 5748.9 | 100% $1^2\Pi$                         |
| $1^2\Pi_{1/2}$      | 2.094 | 595.7 | 3.9  | 590.1 | 5331.0 | 99.78% $1^2\Pi$ , 0.22% $X^2\Sigma^+$ |

Table S8: Bond dissociation energy contributions from *f*-ccCA. All results are in kcal mol<sup>-1</sup>.

|                                    | LuH   | LuN    | NH    | 1) LuNH→LuN+H | 2) LuNH→Lu+NH | 3) LuNH→Lu+N+H |
|------------------------------------|-------|--------|-------|---------------|---------------|----------------|
| HF/triple- $\zeta$                 | 63.15 | -24.75 | 48.35 | 140.71        | 67.61         | 115.96         |
| HF/quadruple- $\zeta$              | 63.25 | -24.54 | 48.46 | 140.86        | 67.87         | 116.33         |
| HF/CBS                             | 63.27 | -24.48 | 48.49 | 140.91        | 67.93         | 116.43         |
| MP2/double- $\zeta$                | 9.17  | 80.71  | 25.34 | -0.34         | 55.03         | 80.37          |
| MP2/triple- $\zeta$                | 8.97  | 82.81  | 29.75 | 4.93          | 58.00         | 87.74          |
| MP2/quadruple- $\zeta$             | 8.64  | 84.03  | 30.62 | 6.82          | 60.21         | 90.84          |
| MP2/CBS                            | 8.43  | 84.78  | 31.07 | 7.90          | 61.61         | 92.68          |
| ZPE                                | -2.13 | -1.08  | -4.66 | -6.78         | -3.20         | -7.86          |
| $\Delta$ CCSD(T)                   | 5.98  | 26.82  | 2.46  | -35.84        | -11.49        | -9.02          |
| Core-valence double- $\zeta$       | 0.73  | 0.79   | 0.15  | 0.72          | 1.36          | 1.51           |
| Spin-orbit                         | -3.32 | -2.88  | 0.00  | 0.06          | -3.36         | -3.36          |
| <b><i>f</i>-ccCA D<sub>0</sub></b> | 72.96 | 83.95  | 77.50 | 106.96        | 112.86        | 190.36         |

Table S9: Bond dissociation energy contributions from HEAT. All results in kcal mol<sup>-1</sup>. For LuNH CCSDT/cc-pVQZ was intractable so it was not calculated.

|                                 | LuH   | LuN    | NH    | 1) LuNH→LuN+H | 2) LuNH→Lu+NH | 3) LuNH→Lu+N+H |
|---------------------------------|-------|--------|-------|---------------|---------------|----------------|
| HF/double- $\zeta$              | 62.53 | -28.59 | 46.91 | 140.68        | 65.18         | 112.09         |
| HF/triple- $\zeta$              | 63.00 | -25.38 | 48.27 | 141.26        | 67.61         | 115.88         |
| HF/quadruple- $\zeta$           | 63.15 | -24.65 | 48.46 | 140.98        | 67.87         | 116.33         |
| CBS                             | 63.16 | -25.15 | 48.38 | 140.89        | 67.37         | 115.74         |
| CCSD/triple- $\zeta$            | 15.19 | 84.05  | 31.11 | -12.53        | 40.41         | 71.52          |
| CCSD/quadruple- $\zeta$         | 14.85 | 87.74  | 32.37 | -12.40        | 42.97         | 75.33          |
| CBS (CCSD)                      | 14.60 | 90.43  | 33.29 | -12.32        | 44.83         | 78.12          |
| CCSD(T)/triple- $\zeta$         | -0.17 | 22.06  | 0.88  | -15.08        | 6.10          | 6.99           |
| CCSD(T)/quadruple- $\zeta$      | -0.21 | 23.42  | 1.37  | -15.67        | 6.39          | 7.76           |
| CBS (CCSD(T))                   | -0.23 | 24.42  | 1.72  | -16.10        | 6.60          | 8.32           |
| Core valence/triple- $\zeta$    | -0.29 | 3.67   | 0.47  | -3.69         | -0.49         | -0.02          |
| Core valence/quadruple- $\zeta$ | -0.20 | 1.21   | -0.02 | -1.55         | -0.33         | -0.34          |
| CBS (core-valence)              | -0.14 | -0.59  | -0.37 | 0.01          | -0.21         | -0.58          |
| ZPE                             | -2.13 | -1.08  | -4.66 | -6.78         | -3.20         | -7.86          |
| Spin-orbit                      | -3.32 | -2.88  | 0.00  | -0.48         | -3.36         | -3.36          |
| CCSDT/triple- $\zeta$           | -0.16 | -9.35  | 0.07  | 8.74          | -0.68         | -0.61          |
| CCSDT/quadruple- $\zeta$        | -0.11 | -9.74  | 0.00  | -             | -             | -              |
| CBS (CCSDT)                     | -0.07 | -10.03 | -     | -             | -             | -              |

|                                      |       |       |       |        |        |        |
|--------------------------------------|-------|-------|-------|--------|--------|--------|
| CCSDT- $\lambda(Q)$ /double- $\zeta$ | -0.20 | 3.38  | 0.05  | -2.91  | 0.41   | 0.46   |
| <b>HEAT <math>D_0</math></b>         | 71.67 | 78.50 | 78.47 | 111.05 | 111.76 | 190.23 |

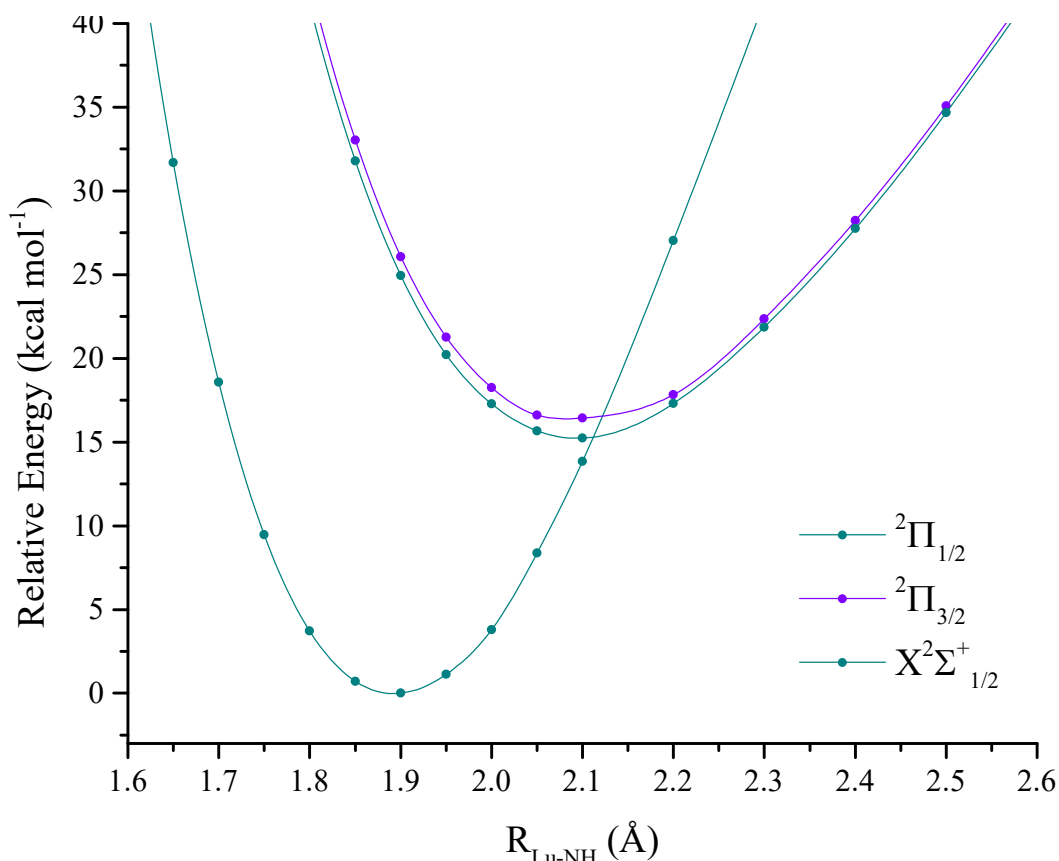

Figure S1 - LuNH core MRCI+Q spin-orbit potential energy curves (kcal mol<sup>-1</sup>) as a function of the Lu-NH distance

### Extended Computational Details

The *f*-block *ab initio* correlation consistent composite approach (*f*-ccCA) and the high accuracy extrapolated *ab initio* thermochemistry (HEAT) scheme were used to determine the bond dissociation energies (BDEs) of LuH, LuN, as well as the different dissociation channels for LuNH. *f*-ccCA attempts to approximate coupled cluster singles, doubles and perturbative triples, extrapolated to the complete basis set limit with the core-valence electrons correlated, and relativistic effects addressed with third-order Douglas-Kroll-Hess core-valence (CCSD(T)-CV-DK3/CBS). HEAT in this study is used to approximate a full configuration interaction extrapolated to the complete basis set limit with core-valence electrons correlated and relativistic effects handled with a third-order Douglas-Kroll-Hess Hamiltonian (FCI-CV-DK3/CBS). Ref<sup>2,3</sup> provide the full details of these composites, with an overview of the scheme shown here.

Throughout the *f*-ccCA composite scheme third-order Douglas Kroll Hess (DKH3) is used to account for relativistic effects.

Eqn. 1 shows the components of  $f$ -ccCA

$$(1) E(f\text{-ccCA}) = E_0(f\text{-ccCA}) + \Delta E(\text{CC}) + \Delta E(\text{CV}) + \Delta \text{ZPE} + \Delta E(\text{SO})$$

$E(f\text{-ccCA})$  is the reference energy,  $\Delta E(\text{CC})$  is the correlation contribution to the total energy,  $\Delta E(\text{CV})$  is a term that accounts for core-valence correlation energy,  $\Delta \text{ZPE}$  is the zero-point energy, and  $\Delta E(\text{SO})$  the spin-orbit contribution, particularly important for the heavy elements.

$E_0(f\text{-ccCA})$  the reference energy of  $E(f\text{-ccCA})$  is the sum of Hartree-Fock and Møller-Plesset second order (MP2) at complete basis set level with extrapolated energies. The Hartree Fock complete basis set energy is determined with the cc-pVTZ-DK3 and cc-pVQZ-DK3 basis sets for Lu<sup>4</sup> and aug-cc-pVTZ-DK, and aug-cc-pVQZ-DK for the lighter elements.<sup>5-7</sup> The energies are extrapolated to the CBS limit with the following formula<sup>8,9</sup>:

$$(2) E(n) = E_{\text{CBS}} + A * \exp(-1.63n)$$

The MP2 contribution to  $E_0(f\text{-ccCA})$  is determined with the inverse gaussian formula of Peterson and workers<sup>10</sup>:

$$(3) E(n) = E_{\text{CBS}} + A \exp[-(n-1)] + B \exp[-(n-1)^2]$$

using energies determined with the cc-pVnZ-DK3 (n=D,T,Q) basis sets for Lu, and the aug-cc-pVnZ-DK sets for the light elements. In equation 3 A and B are determined during the fitting of the energies. To account for electron correlation beyond MP2, coupled cluster singles, doubles, and perturbative triple excitations (CCSD(T)) with cc-pVTZ-DK3 for Lu and cc-pVTZ-DK for the light elements was used.

$$(4) E(\text{CC}) = E[\text{CCSD(T)/cc-pVTZ-DK}] - E[\text{MP2/cc-pVTZ-DK}]$$

To correct for missing core-valence and core-core correlation  $E(\text{CV})$ , CCSD(T) was paired with the cc-pwCVDZ<sup>4</sup> basis set with, and without core-electrons

$$(5) E(\text{CV}) = E[\text{CCSD(T,FC1)/cc-pwCVDZ-DK3}] - E[\text{CCSD(T)/cc-pwCVDZ-DK3}]$$

FC1 (Frozen Core 1) corresponds to the sub-valence computation. For Lu this corresponds to correlating the 4s, 4p, and 4d electrons beyond the 5s, 5p, 6s, 4f, and 5d electrons of lutetium. For nitrogen, it corresponds to correlating the 1s orbital. ZPE was obtained from a CCSD(T)/cc-pVTZ-DK3 optimization and frequency computation. The spin-orbit coupling  $E(\text{SO})$  is computed with the following equation:

$$(6) E(\text{SO}) = \text{SO}(\text{LuH}, \text{LuH}, \text{LuNH}) - \text{SO}(\text{Xi})$$

Where  $\text{SO}(\text{LuH}, \text{LuN}, \text{LuNH})$  is the spin-orbit correction for the molecular species, and  $\text{SO}(\text{Xi})$  is the atomic spin-orbit. For the atomic spin-orbit this is derived from  $j$ -averaging the energy levels obtained from NIST. The  $j$ -averaging is performed with the following equation:

$$(7) \text{SO}(X_i) = \frac{\sum_J (2J+1) \Delta E_J}{\sum_J (2J+1)}$$

$J$  is the total angular momentum of the state and  $\Delta E_J$  is the energy difference between the ground state and state  $J$  energies. For the molecular spin-orbit correction term, a multireference wavefunction was constructed with a mixture of ground and close lying excited states to obtain the spin-orbit correction.<sup>11,12</sup>

HEAT was adapted from Ref. <sup>2</sup> with a few modifications for a lutetium-containing molecular system; third-order Douglas-Kroll-Hess was used throughout to account for one-electron scalar relativistic effects. The

extrapolations for Hartree-Fock and the CCSD and (T) contributions were taken from Ref. <sup>13</sup>. Throughout this portion of the work ROHF references are used throughout.

HEAT consists of a series of computations to approximate a relativistic full configuration interaction (FCI) energy at a comparatively reduced cost. Equation 8 shows the implementation of HEAT.

$$(8) E_{\text{HEAT}} = E_{\text{HF}} + E_{\text{CCSD}} + E_{\text{(T)}} + \Delta E_{\text{CV}} + \Delta E_{\text{CCSDT}} + \Delta E_{\Lambda\text{-CCSDT(Q)}} + E_{\text{ZPE}} + \Delta E_{\text{SO}}$$

The Diagonal Born Oppenheimer Correction, which is usually included in the HEAT composite scheme, was not included due to convergence issues.

$E_{\text{HF}}$  was extrapolated with the formula of Feller<sup>14</sup> with the cc-pVDZ-DK3, cc-pVTZ-DK3, and cc-pVQZ-DK3 sets on lutetium, and the aug-cc-pVDZ-DK, aug-cc-pVTZ-DK, and aug-cc-pVQZ-DK basis sets on H and N.

$$(9) E_{\text{HF}} = E_{\text{HF}} + a \exp(-bX)$$

$E_{\text{CCSD}}$  and  $E_{\text{(T)}}$  are extrapolated with the cc-pVTZ-DK3 and cc-pVQZ-DK3 sets on lutetium, and aug-cc-pVTZ-DK and aug-cc-pVQZ-DK. The simple  $X^3$  equation of Helgaker is used for both energies.<sup>15</sup>

$$(10) E_{\text{CCSD}} = E_{\text{CCSD}} + ax^3$$

$$(11) E_{\text{(T)}} = E_{\text{(T)}} + ax^3$$

The  $E_{\text{CV}}$  term is the difference between the CBS extrapolated core-valence definition used in  $f$ -ccCA and the frozen core CBS limit

$$(12) \text{ECCSD(T,FC1)/CBS} - \text{ECCSD(T,VAL)}$$

where for FC1 the cc-pWCVTZ-DK3 and cc-pWCVQZ-DK3 sets were used for the  $E(\text{CCSDT,FC1})/\text{CBS}$  computations, and cc-pVTZ-DK3 and cc-pVQZ-DK3 for the frozen-core  $\text{ECCSD(T,VAL)}$  computation. For the light atoms (H, N) aug-cc-pCVTZ-DK and aug-cc-pCVQZ-DK were used.<sup>16</sup> Both energies were extrapolated with the Helgaker formula as in eqn. (10).

The  $E_{\text{CCSDT}}$  energy<sup>17</sup> was extrapolated to the CBS limit using eqn. (10).  $\text{CCSD(T)}$  is extrapolated with this equation as well with the cc-pVTZ-DK3 and cc-pVQZ-DK3 basis sets for Lu, and cc-pVTZ-DK and cc-pVQZ-DK on N and H.

$$(13) E_{\text{CCSDT}} = \text{CCSDT(CBS)} - \text{CCSD(T)(CBS)}$$

Eqn. (13) could only be performed with cc-pVTZ-DK3/cc-pVTZ-DK for LuNH due to the extreme costs.

Full iterative quadruples were intractable for even LuH, which lead to the need to for a treatment of quadruples. Perturbative quadruples approaches exist but are known to have issues with pathological systems (see LuN's CI vectors).  $\Lambda\text{-CCSDT(Q)}$  has been shown to obtain accurate results for the well-known multireference  $\text{O}_3$ <sup>18</sup>, and was used to account for excitations beyond full triples.<sup>19</sup> This was done with the cc-pVDZ-DK3 set on lutetium, and cc-pVDZ-DK on N and H. Eqn. (12) shows the implementation.

$$(14) E_{\Lambda\text{-CCSDT(Q)}} = E_{\Lambda\text{-CCSDT(Q)}} - E_{\text{CCSDT}}$$

The geometry and ZPE used throughout this were obtained as per  $f$ -ccCA; the spin-orbit was obtained with the same strategy as in  $f$ -ccCA and will not be expanded upon further. All computations for  $f$ -ccCA were performed with MOLPRO 2020. All  $\text{CCSD(T)}$ <sup>20</sup> computations for HEAT were performed with MOLPRO 2020.<sup>21</sup> The higher order coupled cluster computations in HEAT were performed with MRCC.<sup>22</sup>

## Bibliography

- 1 J. Assaf, F. El Haj Hassan, É. C. M. Nascimento and A. Haydar, Theoretical Study of LuH Molecule: Potential Energy Curves, Spectroscopic Constants and Spin-orbit Couplings, *Comput. Theor. Chem.*, 2018, **1128**, 31–41.
- 2 L. Cheng, J. Gauss, B. Ruscic, P. B. Armentrout and J. F. Stanton, Bond Dissociation Energies for Diatomic Molecules Containing 3d Transition Metals: Benchmark Scalar-Relativistic Coupled-Cluster Calculations for 20 Molecules, *J. Chem. Theory Comput.*, 2017, **13**, 1044–1056.
- 3 N. M. S. Almeida, T. R. L. Melin, S. C. North, B. K. Welch and A. K. Wilson, Ab Initio Composite Strategies and Multireference Approaches for Lanthanide Sulfides and Selenides, *J. Chem. Phys.*, 2022, **157**, 24105.
- 4 Q. Lu and K. A. Peterson, Correlation Consistent Basis Sets for Lanthanides: The Atoms La–Lu, *J. Chem. Phys.*, 2016, **145**, 054111.
- 5 W. A. de Jong, R. J. Harrison and D. A. Dixon, Parallel Douglas–Kroll Energy and Gradients in NWChem: Estimating Scalar Relativistic Effects using Douglas–Kroll Contracted Basis Sets, *J. Chem. Phys.*, 2001, **114**, 48–53.
- 6 T. H. Dunning, Gaussian Basis Sets for Use in Correlated Molecular Calculations. I. The Atoms Boron Through Neon and Hydrogen, *J. Chem. Phys.*, 1989, **90**, 1007–1023.
- 7 R. A. Kendall, T. H. Dunning and R. J. Harrison, Electron Affinities of the First-Row Atoms Revisited. Systematic Basis Sets and Wave Functions, *J. Chem. Phys.*, 1992, **96**, 6796–6806.
- 8 A. Halkier, T. Helgaker, P. Jørgensen, W. Klopper and J. Olsen, Basis-Set Convergence of the Energy in Molecular Hartree-Fock Calculations, *Chem. Phys. Lett.*, 1999, **302**, 437–446.
- 9 T. G. Williams, N. J. DeYonker and A. K. Wilson, Hartree-Fock Complete Basis Set Limit Properties for Transition Metal Diatomics, *J. Chem. Phys.*, 2008, **128**, 044101.
- 10 K. A. Peterson, D. E. Woon and T. H. Dunning, Benchmark Calculations with Correlated Molecular Wave Functions. IV. The Classical Barrier Height of the  $H+H_2 \rightarrow H_2+H$  Reaction, *J. Chem. Phys.*, 1994, **100**, 7410–7415.
- 11 A. Berning, M. Schweizer, H.-J. Werner, P. J. Knowles and P. Palmeri, Spin-orbit Matrix Elements for Internally Contracted Multireference Configuration Interaction Wavefunctions, *Mol. Phys.*, 2000, **98**, 1823–1833.
- 12 H.-J. Werner and P. J. Knowles, A Second Order Multiconfiguration SCF Procedure with Optimum Convergence, *J. Chem. Phys.*, 1985, **82**, 5053–5063.
- 13 A. Tajti, P. G. Szalay, A. G. Császár, M. Kállay, J. Gauss, E. F. Valeev, B. A. Flowers, J. Vázquez and J. F. Stanton, HEAT: High Accuracy Extrapolated Ab Initio Thermochemistry, *J. Chem. Phys.*, 2004, **121**, 11599–11613.
- 14 D. Feller, Application of Systematic Sequences of Wave Functions to the Water Dimer, *J. Chem. Phys.*, 1992, **96**, 6104–6114.
- 15 T. Helgaker, W. Klopper, H. Koch and J. Noga, Basis-Set Convergence of Correlated Calculations on Water, *J. Chem. Phys.*, 1997, **106**, 9639–9646.
- 16 D. E. Woon and T. H. Dunning, Gaussian Basis Sets for Use in Correlated Molecular Calculations.



- V. Core-Valence Basis Sets for Boron Through Neon, *J. Chem. Phys.*, 1995, **103**, 4572–4585.
- 17 M. Kállay and P. R. Surján, Higher Excitations in Coupled-Cluster Theory, *J. Chem. Phys.*, 2001, **115**, 2945–2954.
- 18 M. Spiegel, E. Semidalas, J. M. L. Martin, M. R. Bentley and J. F. Stanton, Post-CCSD(T) Corrections to Bond Distances and Vibrational Frequencies: The Power of  $\Lambda$ , *Mol. Phys.*, 2023, e2252114.
- 19 M. Kállay and J. Gauss, Approximate Treatment of Higher Excitations in Coupled-Cluster Theory, *J. Chem. Phys.*, 2005, **123**, 214105.
- 20 P. J. Knowles, C. Hampel and H. Werner, Coupled Cluster Theory for High Spin, Open Shell Reference Wave Functions, *J. Chem. Phys.*, 1993, **99**, 5219–5227.
- 21 H.-J. Werner, P. J. Knowles, F. R. Manby, J. A. Black, K. Doll, A. Heßelmann, D. Kats, A. Köhn, T. Korona, D. A. Kreplin, Q. Ma, T. F. Miller, A. Mitrushchenkov, K. A. Peterson, I. Polyak, G. Rauhut and M. Sibaev, The Molpro quantum chemistry package, *J. Chem. Phys.*, 2020, **152**, 144107.
- 22 M. Kállay, P. R. Nagy, D. Mester, Z. Rolik, G. Samu, J. Csontos, J. Csóka, P. B. Szabó, L. Gyevi-Nagy, B. Hégyel, I. Ladjánszki, L. Szegedy, B. Ladóczki, K. Petrov, M. Farkas, P. D. Mezei and Á. Ganyecz, The MRCC Program System: Accurate Quantum Chemistry from Water to Proteins, *J. Chem. Phys.*, 2020, **152**, 74107.
